# Supplementary material
Source: Springer Nature journal article supplement (https://www.springermedizin.de/resource/supplementary/12974_2010_294_MOESM4_ESM.pdf/9601184)

**A.**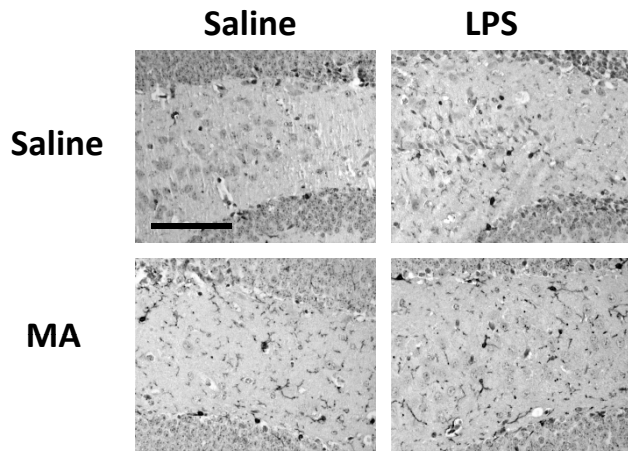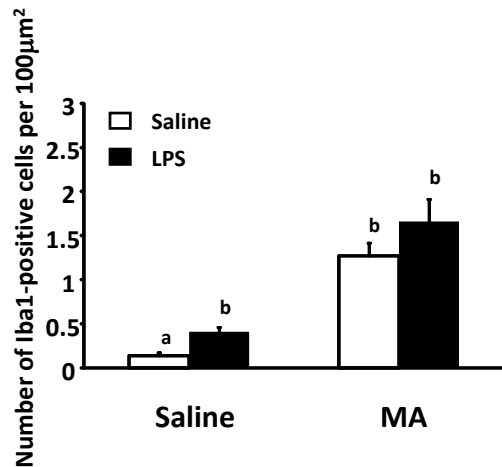**B.**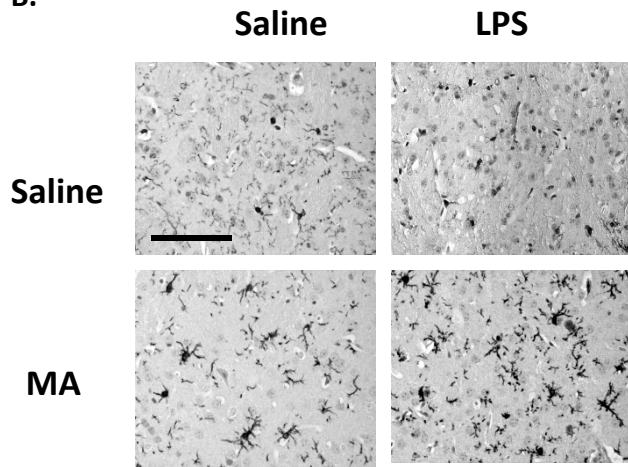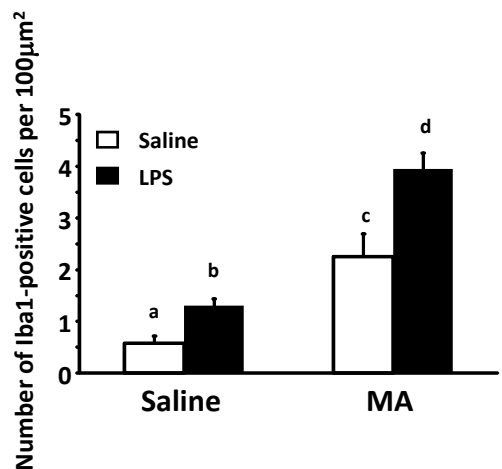

Supplement: MOESM4 [file 9601184]
